# Supplementary material for: A New Xanthone Glycoside from the Endolichenic Fungus Sporormiella irregularis
Source: PubMed Central journal article supplement (PMC6273424; doi:10.3390/molecules21060764), 2016-06-11
Supplement: molecules-21-00764-s001.pdf [file molecules-21-00764-s001.pdf]

# Supplementary Materials: A New Xanthone Glycoside from the Endolichenic Fungus *Sporormiella irregularis*

Bin-Jie Yang, Guo-Dong Chen, Yan-Jun Li, Dan Hu, Liang-Dong Guo, Ping Xiong, and Hao Gao

The 1D and 2D NMR spectra of 1 and 2

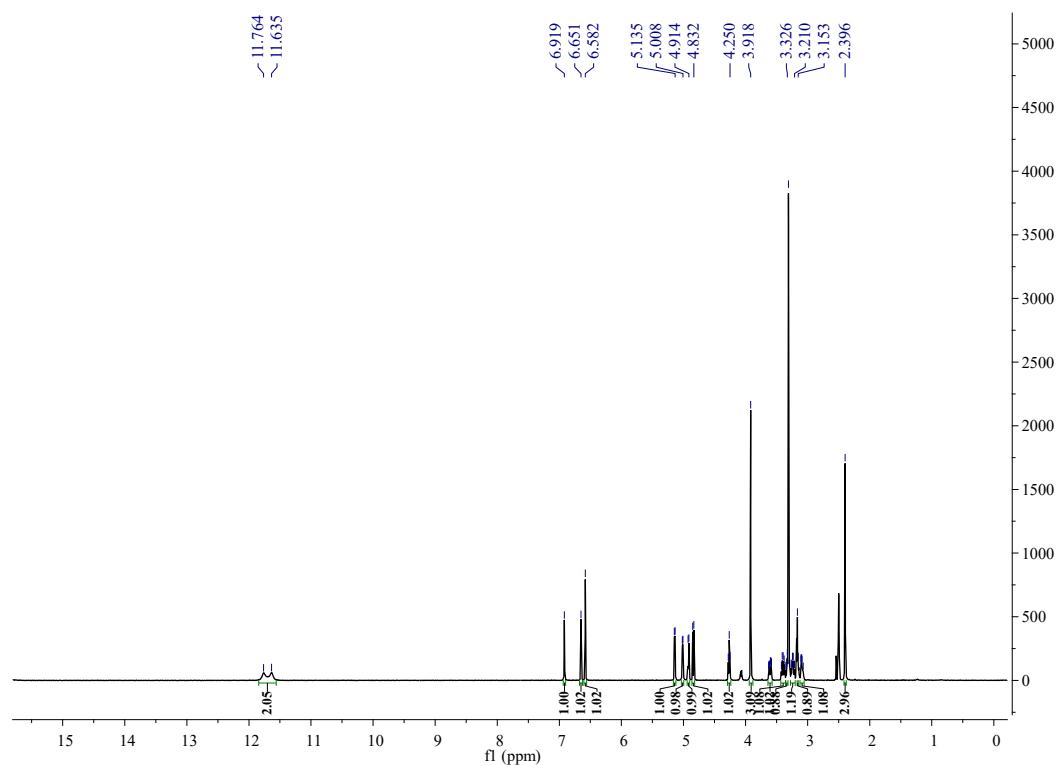

Figure S1.  $^1\text{H-NMR}$  spectrum of 1 (400 MHz, in  $\text{DMSO-}d_6$ ).

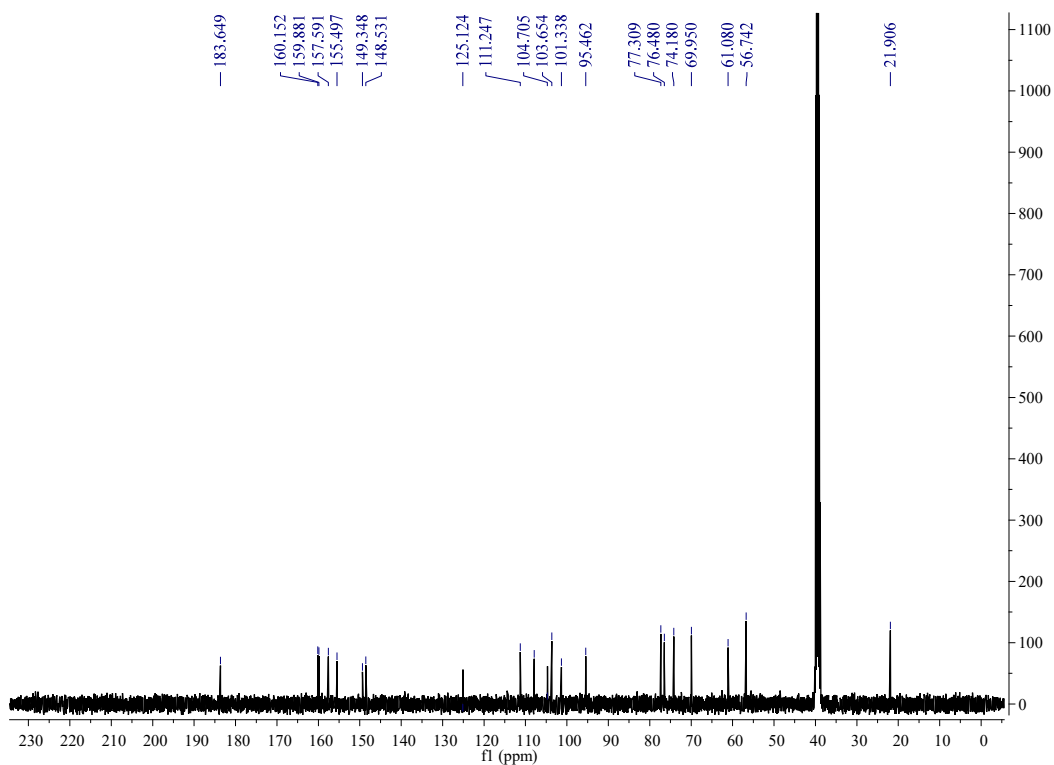

Figure S2.  $^{13}\text{C}$ -NMR spectrum of **1** (100 MHz, in  $\text{DMSO-}d_6$ ).

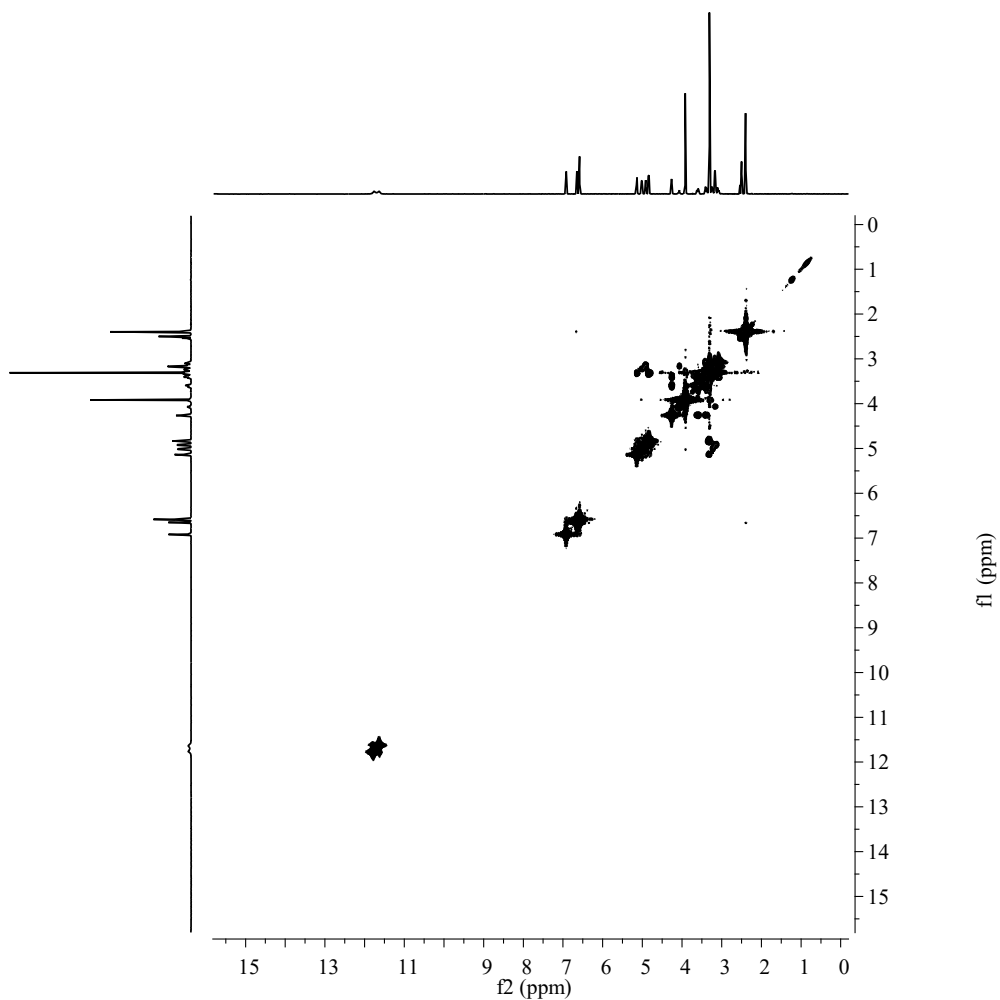

Figure S3.  $^1\text{H}$ - $^1\text{H}$  COSY spectrum for **1** in  $\text{DMSO-}d_6$ .

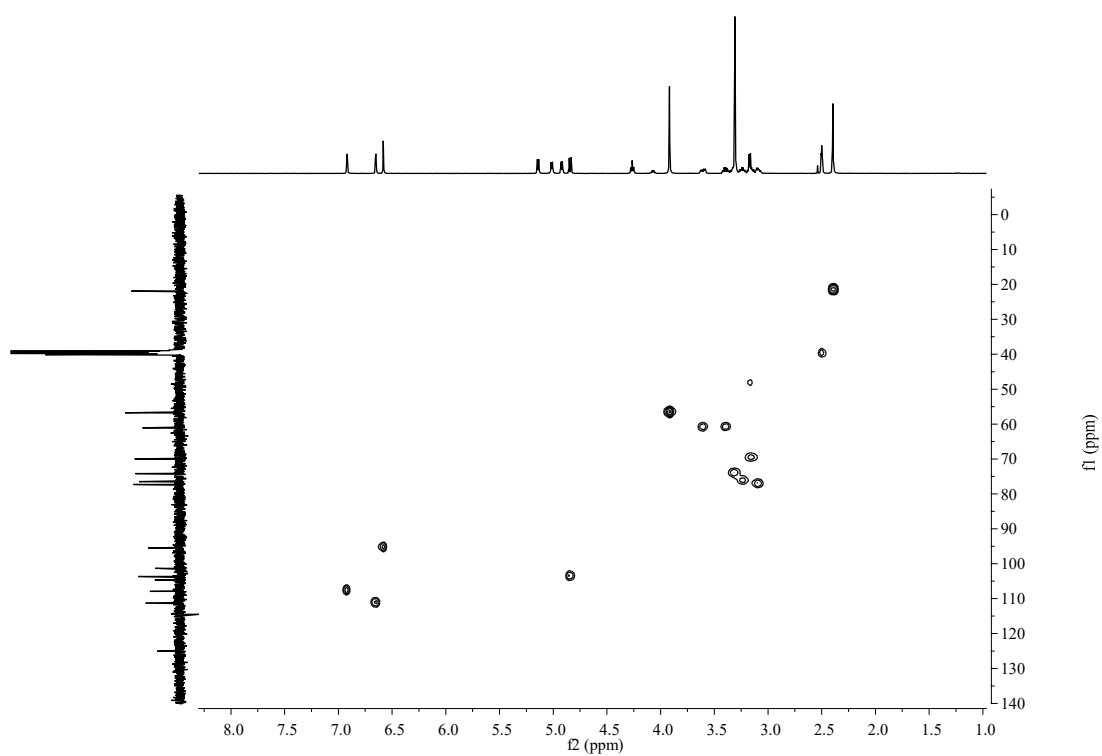

Figure S4. HSQC spectrum for 1 in DMSO-*d*<sub>6</sub>.

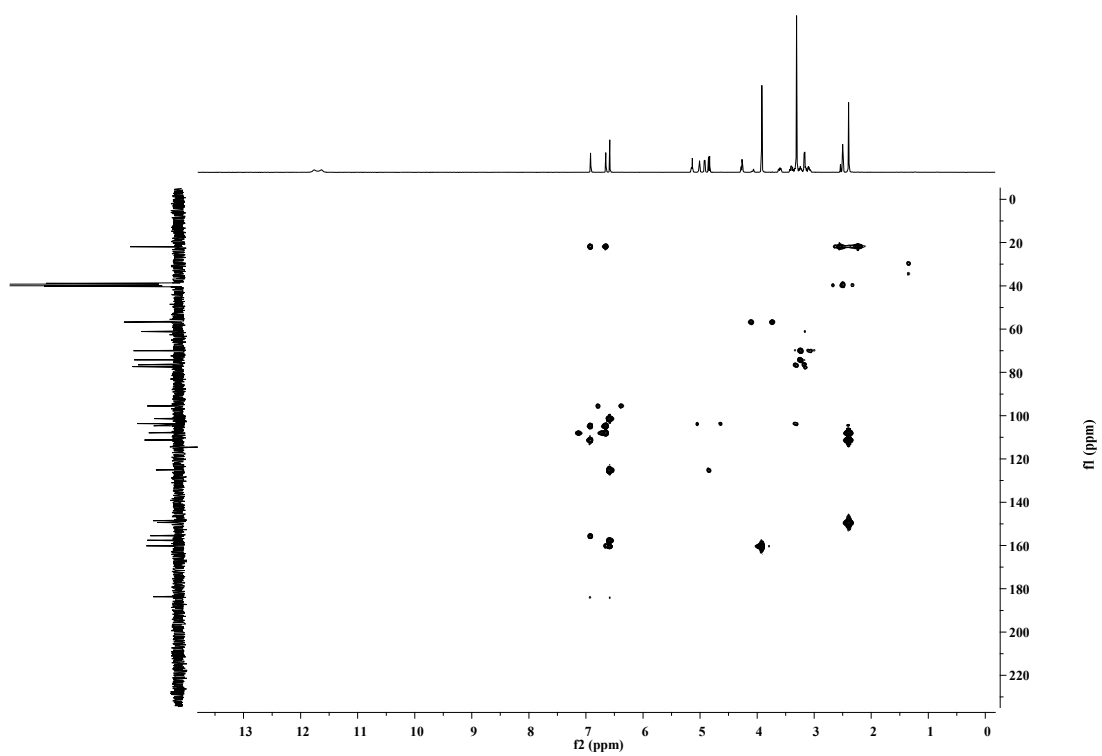

Figure S5. HMBC spectrum for 1 in DMSO-*d*<sub>6</sub>.

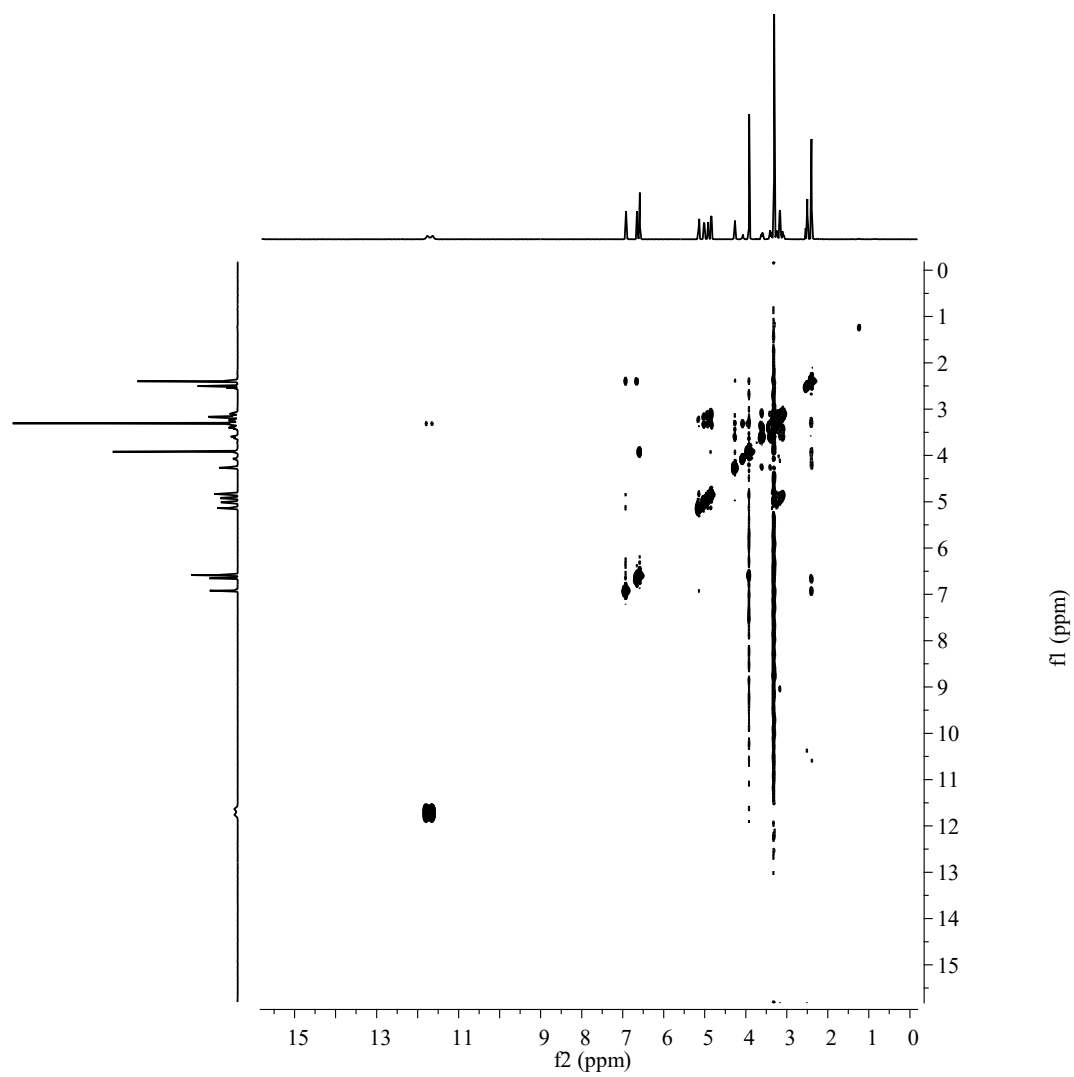

**Figure S6.** ROESY spectrum for **1** in DMSO-*d*<sub>6</sub>.

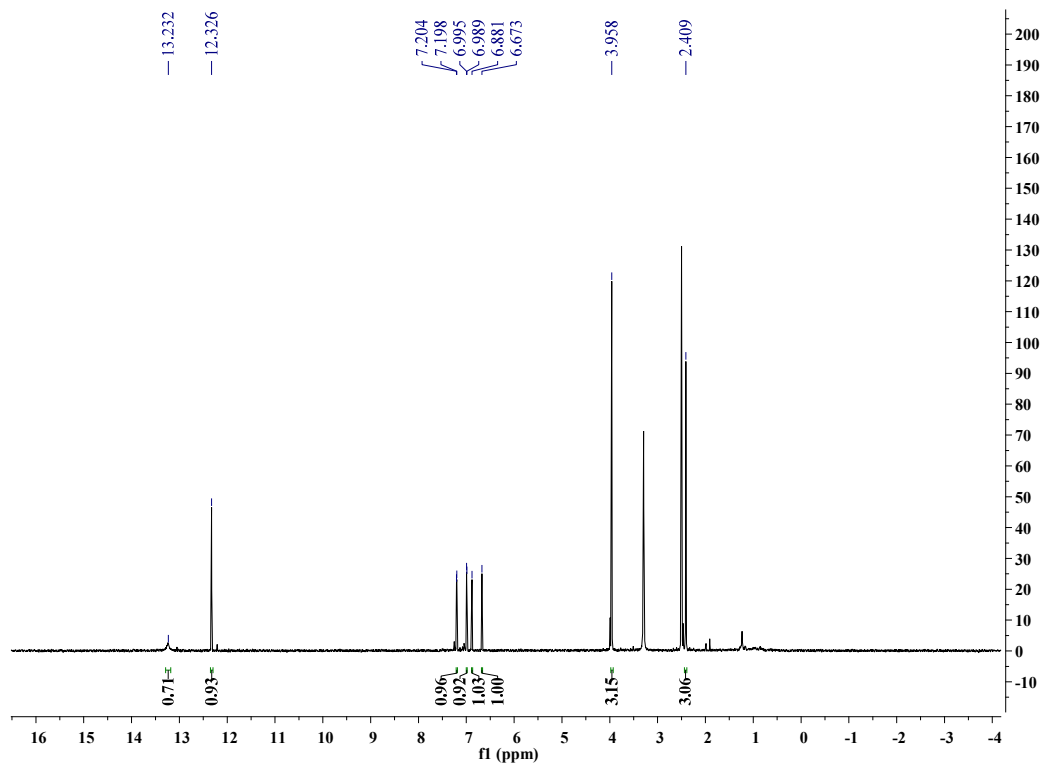Figure S7.  $^1\text{H}$ -NMR spectrum of 2 (400 MHz, in  $\text{DMSO-}d_6$ ).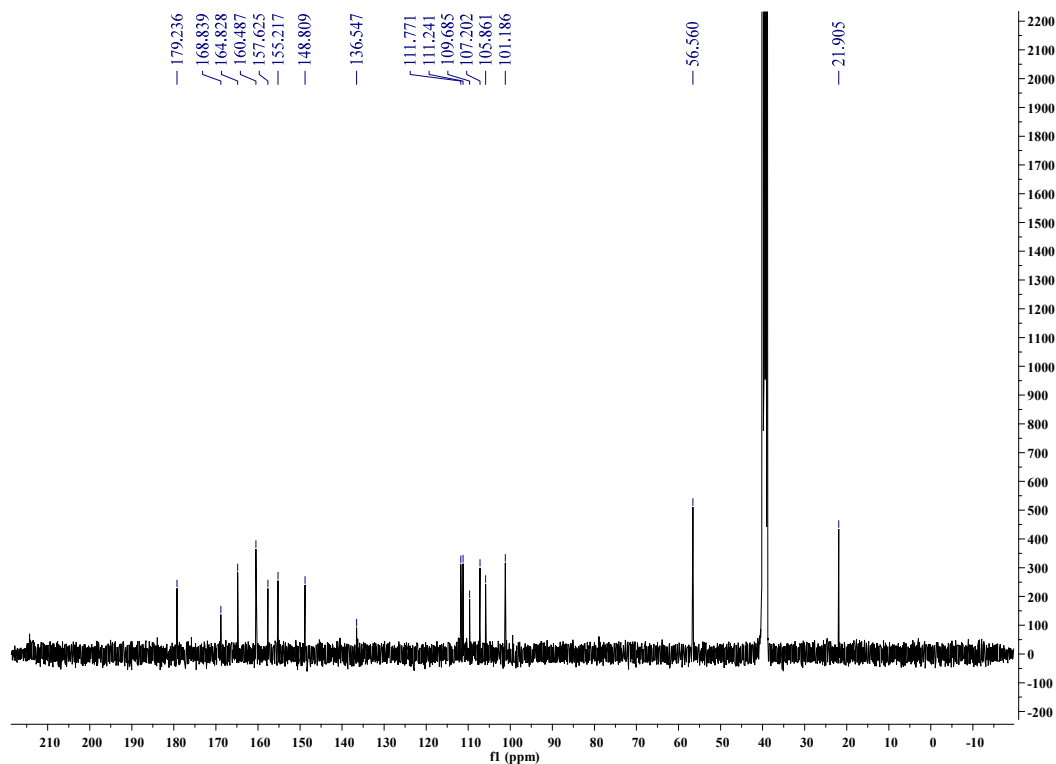Figure S8.  $^{13}\text{C}$ -NMR spectrum of 2 (100 MHz, in  $\text{DMSO-}d_6$ ).

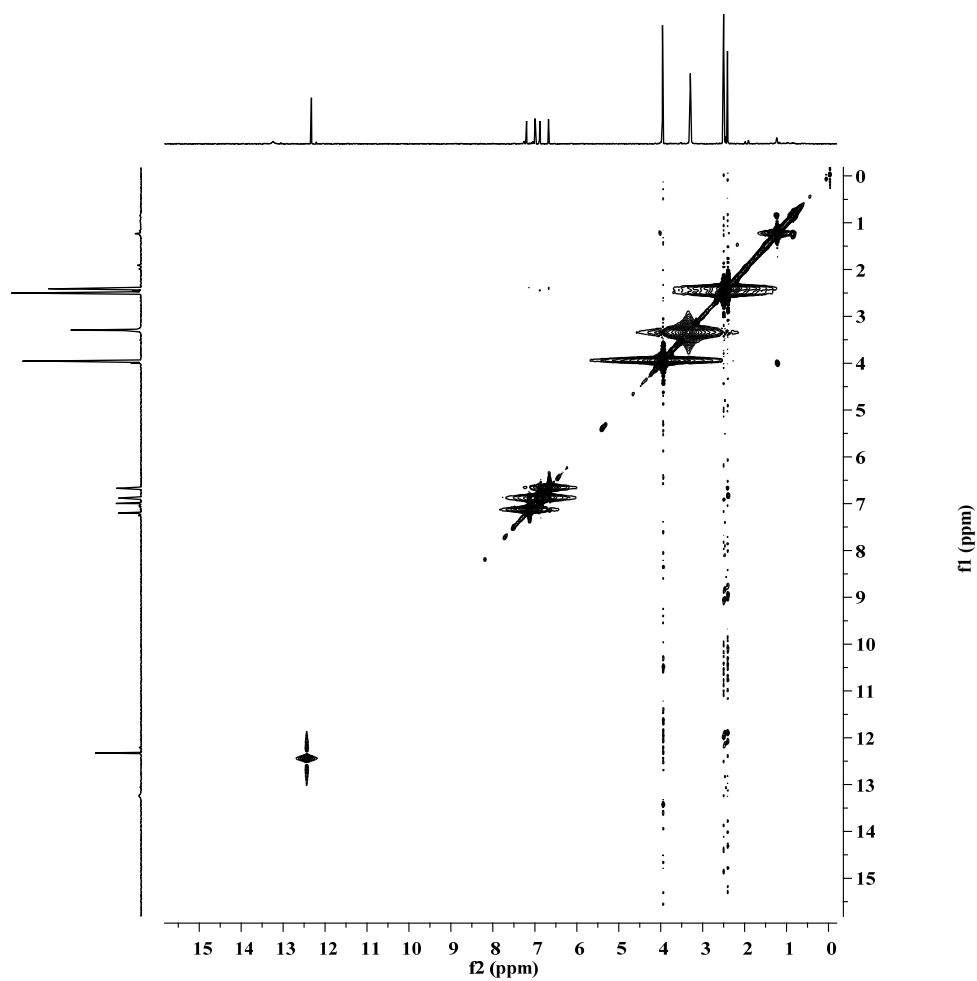

Figure S9. <sup>1</sup>H-<sup>1</sup>H COSY spectrum for **2** in DMSO-*d*<sub>6</sub>.

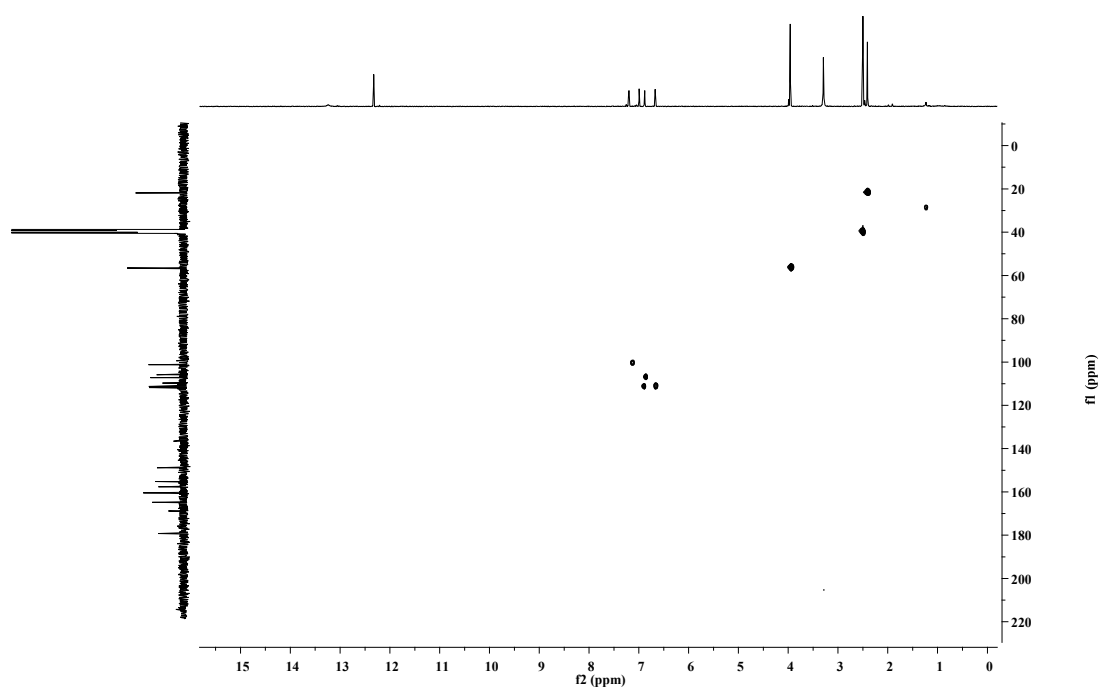

Figure S10. HSQC spectrum for **2** in DMSO-*d*<sub>6</sub>.

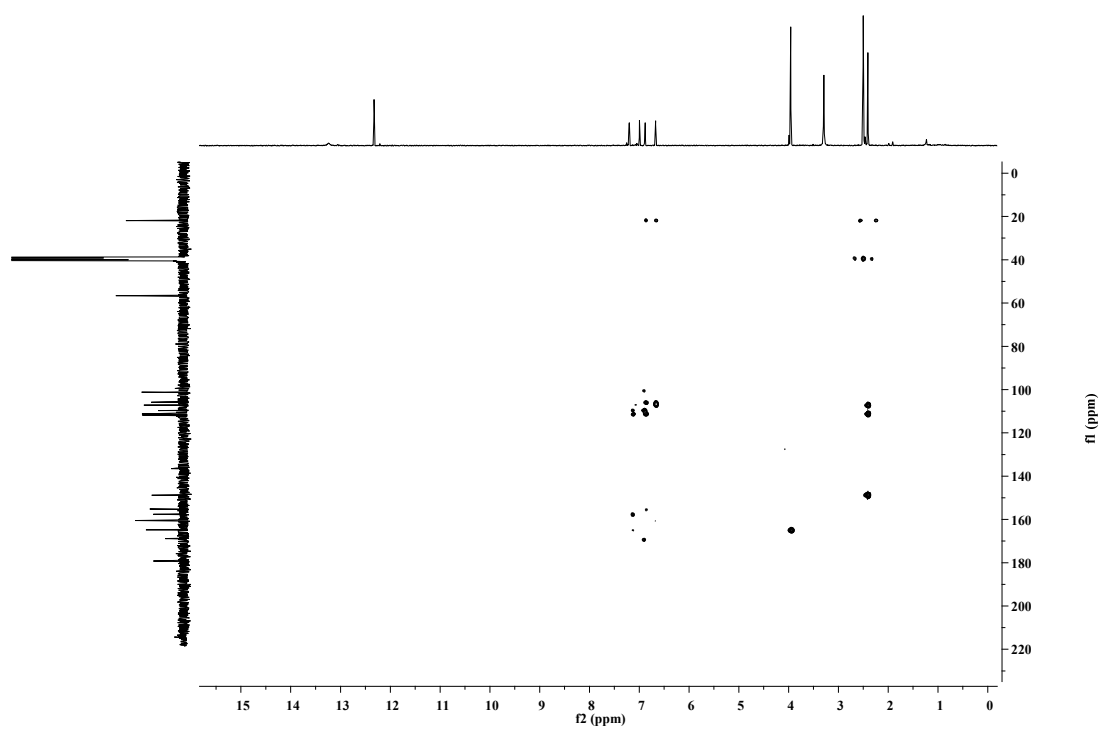Figure S11. HMBC spectrum for 2 in DMSO-*d*<sub>6</sub>.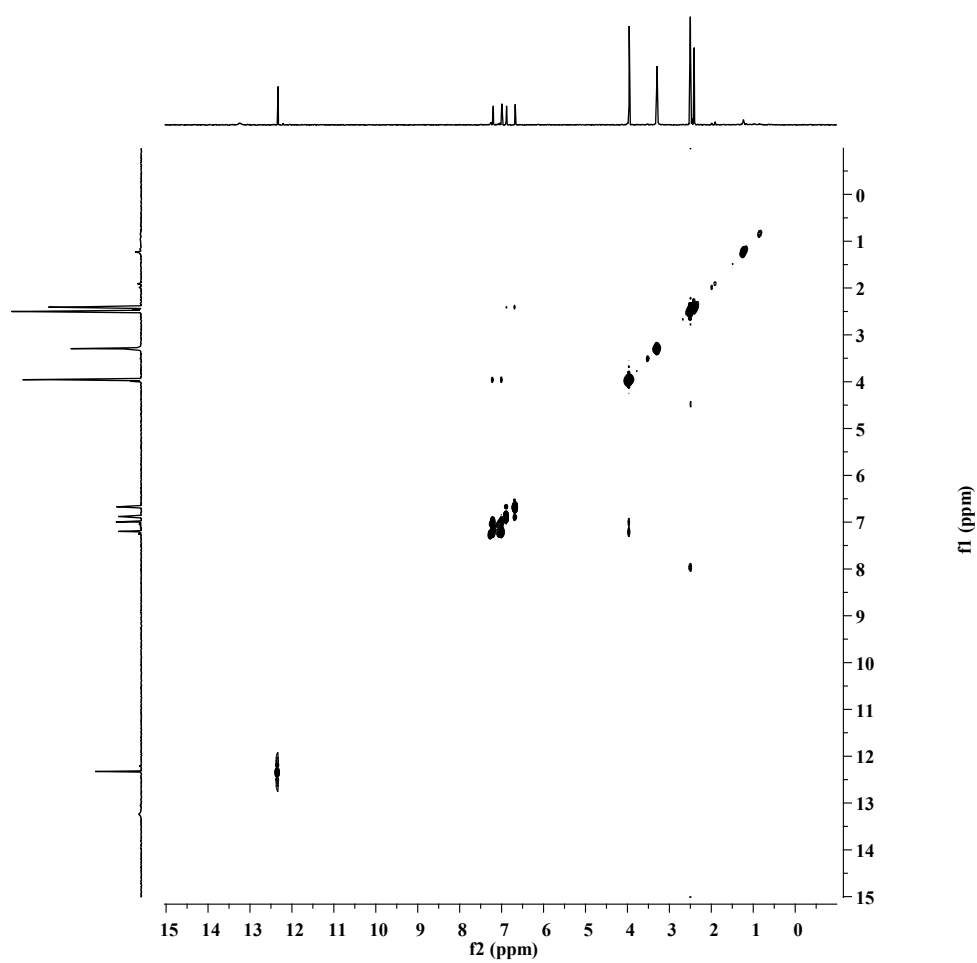Figure S12. ROESY spectrum for 2 in DMSO-*d*<sub>6</sub>.
